# Supplementary material for: Clamping of RNA with PNA enables targeting of microRNA
Source: Royal Society of Chemistry journal article supplement (doi:10.1039/c6ob00516k), 2016-01-01
Supplement: c6ob00516k1.pdf [file c6ob00516k1.pdf]

## Supporting information

for

### Clamping of RNA with PNA enables targeting of microRNA

Alice Ghidini, Helen Bergquist, Merita Murtola, Tanel Punga, Rula Zain and Roger Strömberg\*

Department of Biosciences and Nutrition, Unit for Bioorganic Chemistry,  
Karolinska Institutet, S-14183 Huddinge, Sweden

#### Contents

|                                                                                                            | page |
|------------------------------------------------------------------------------------------------------------|------|
| <b>S1:</b> Material and methods: synthesis of the PNA-conjugates                                           | 2    |
| <b>S2:</b> Characterization of the PNA-conjugates                                                          | 3    |
| <b>S3:</b> Thermal Denaturation analysis                                                                   | 8    |
| <b>S4:</b> Differences in melting point ( $\Delta T_m$ ) upon change of the ratio of PNA 2 to RNA target 1 | 11   |
| <b>S5:</b> Circular Dichroism analysis                                                                     | 12   |
| <b>S6:</b> Gel shift experiments                                                                           | 14   |

## S1. Material and methods: synthesis of the PNA-conjugates.

PNA building blocks were purchased from Link Technologies Ltd (Strathclyde, UK). Fmoc- $\alpha$ N-Lys( $\epsilon$ N-Boc)OH, Fmoc-Dap(Mtt)OH as well as the building blocks for PEG linkers, 3-(2-(2-(9-Fluorenylmethyloxycarbonyl)aminoethoxy)ethoxy)propanoic acid (Fmoc-AEEP), 8-(9-Fluorenylmethyloxycarbonyl-amino)-3,6-dioxaoctanoic acid (Fmoc-AEEA) and 5-(9-Fluorenylmethyloxycarbonyl-amino)-3-oxapentanoic acid were from Iris Biotech GmbH (Marktredwitz, Germany). PNA sequences were assembled automatically on a solid support (Rink Amide resin) using the manufacturer's protocol for the Astra Initiator Biotage peptide synthesizer with 9-fluorenylmethyloxycarbonyl (Fmoc)-chemistry and N,N'-diisopropylcarbodiimide (DIC) as coupling agent and ethyl 2-cyano-2-(hydroxyimino)acetate (Oxyma) as additive. For BisPNA 6 (where the directection of the PNA sequence is reversed) Fmoc-Dap(Mtt)OH was first coupled to the Rink amide resin, then Lysine and the Watson-Crick binding sequence of the PNA was synthesized. After removal of the Mtt protection (as described in our synthesis of PNAszymes, Ghidini, A.; Murtola, M.; Strömberg, R *Org. Biomol. Chem.*, 2016, 14, 2768) the Dap was extended on the side-chain with the PEG-linkers and the triplex forming part of the PNA. High-resolution mass spectrometry (HRMS) was performed on a Micromass LCT electrospray time-of-flight (ES-TOF) mass spectrometer in acetonitrile–water 1:1 (v/v) solutions. The molecular weights of the oligoribonucleotide and peptide nucleic acid conjugates were reconstructed from the m/z values using the mass deconvolution program of the instrument (Mass Lynx software package). The RNA substrate was purchased HPLC purified from Thermoscientific. Concentrations of both RNA and PNA were determined by UV absorption at 260 nm and calculated from extinction coefficients obtained by the nearest neighbor approximation (Puglisi, J.D.; Tinoco Jr, I. *Methods in Enzymology* **1989**, 180, 304-325).

PNA 4 was purified with an Ascentis Express Supelco Peptide ES-C18 (2, 7  $\mu$ m 150  $\times$  4.6mm) column at 60 °C using a flow rate of 1mL/min and a linear gradient of 40% B for 30 min. (A) 0.1% TFA–aq., (B) 0.1% TFA–aq., 50 % MeCN. PNA 4, calculated mass, 2075; found ESI[M+], 2075.

All the other PNAs were purified with an Ascentis Express Supelco Peptide ES-C18 (2, 7  $\mu$ m 150  $\times$  4.6mm) column at 60 °C using a flow rate of 1mL/min and a linear gradient of 40% B for 27 min. (A) 0.1% TFA–aq., (B) 0.1% TFA–aq., 50 % MeCN. BisPNA 1, calculated mass, 5074; found ESI[M+], 5093. PNA 2, calculated mass, 3216; found ESI[M+], 3199. BisPNA 3, calculated mass, 5089; found ESI[M+], 5096. BisPNA 5, calculated mass, 5069; found ESI[M+], 5066. BisPNA 6, calculated mass, 5204; found ESI[M+], 5204. PNA 7, calculated mass, 3312; found ESI[M+], 3313. AntimiR 1, calculated mass, 7111; found ESI[M+], 7109. AntimiR 2, calculated mass, 7285; found ESI[M+], 7282. Ref PNA, calculated mass, 4442; found ESI[M+], 4442.

**S2. Characterization of the PNA-conjugates: ESI-MS(+) (left panel) and chromatograms of purified PNA-conjugates (right panels).**

### BisPNA 1

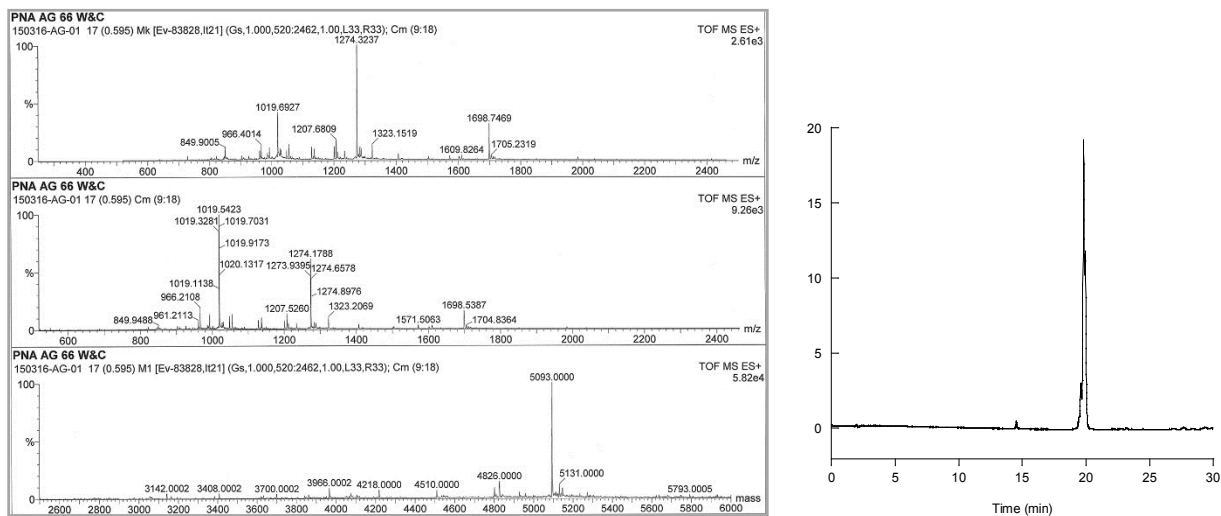

### PNA 2

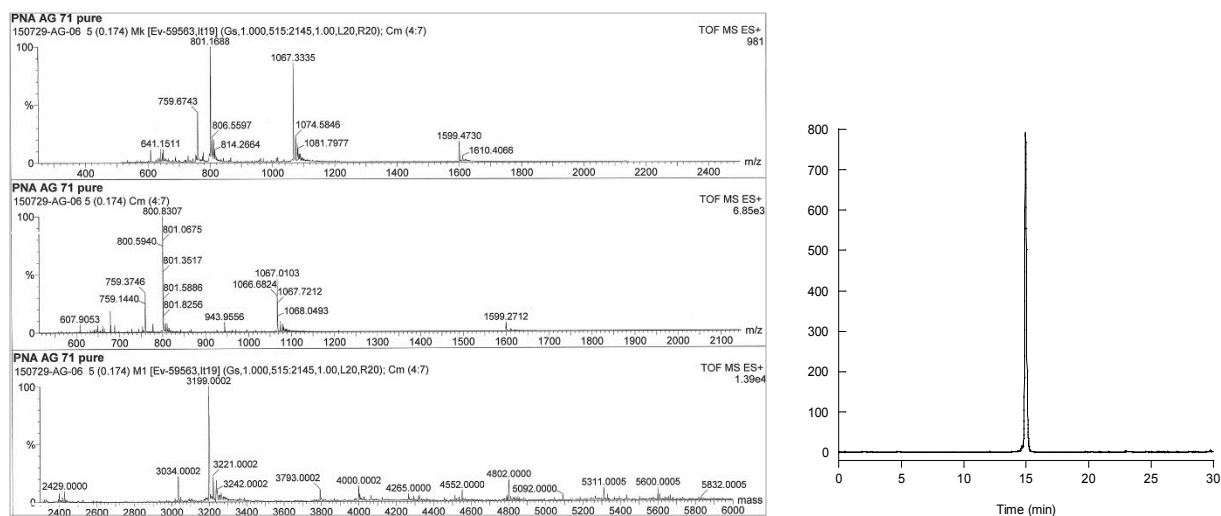

BisPNA 3

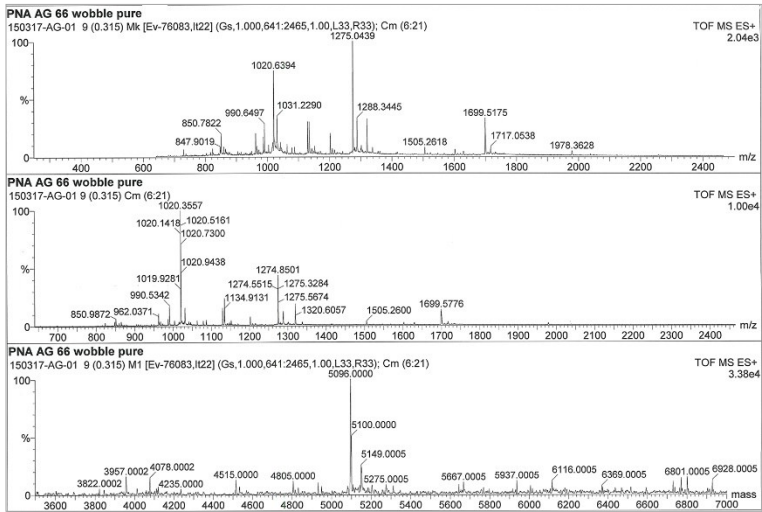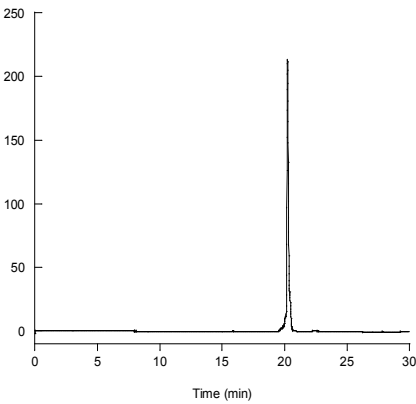

PNA 4

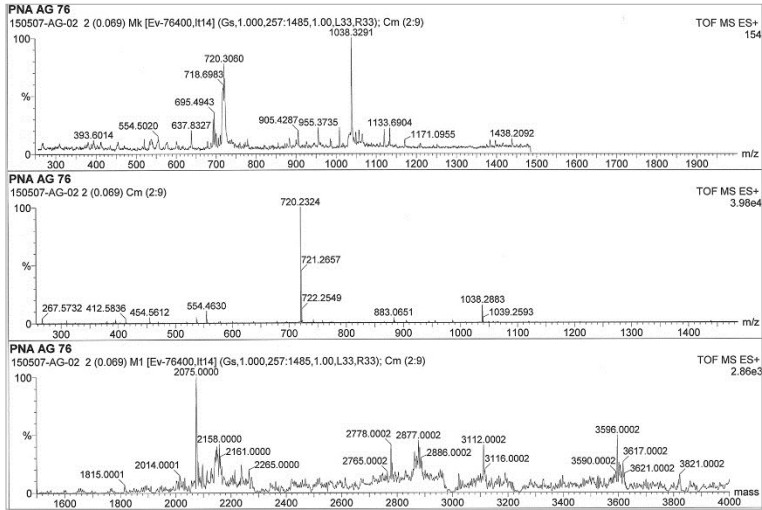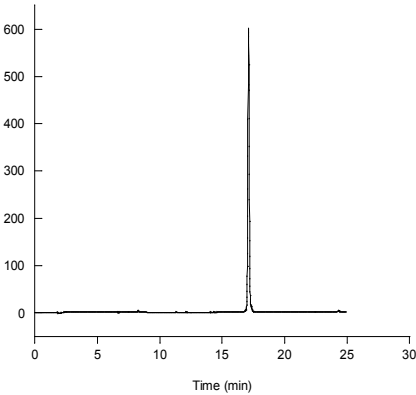

BisPNA 5

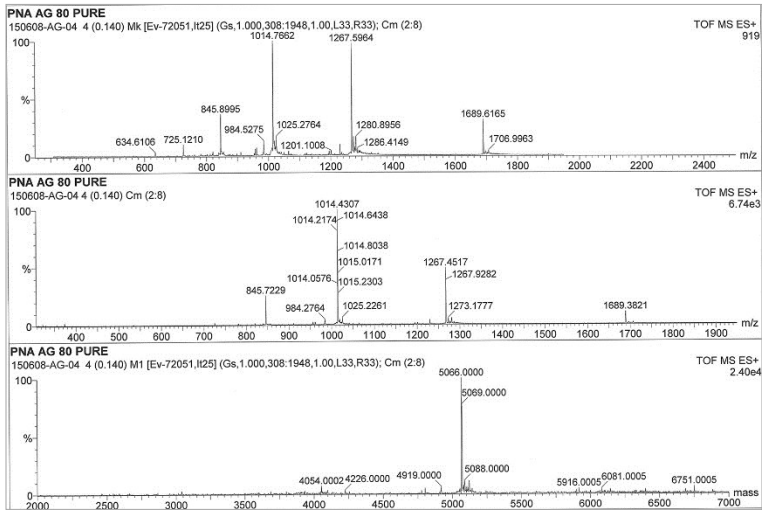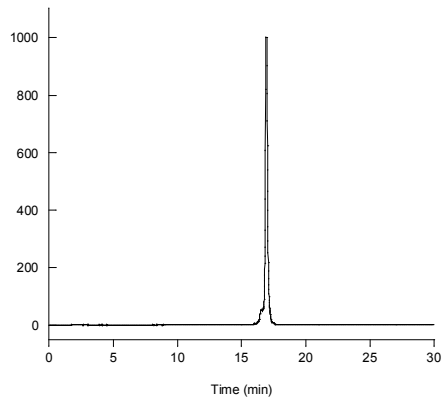

BisPNA 6

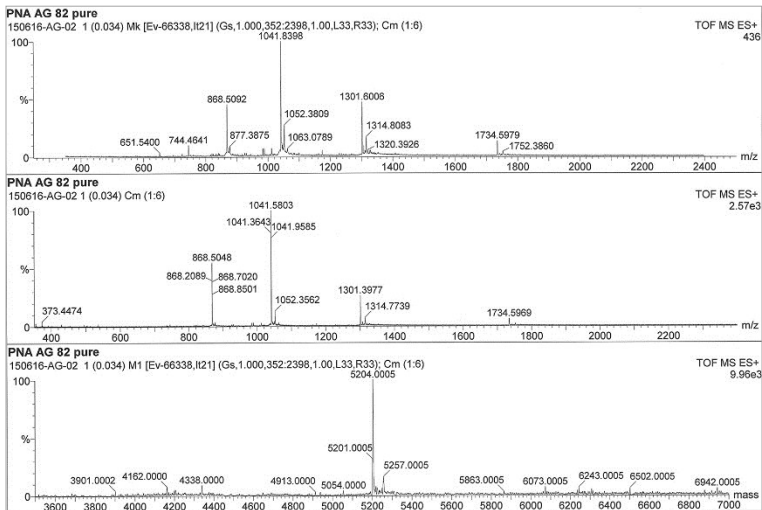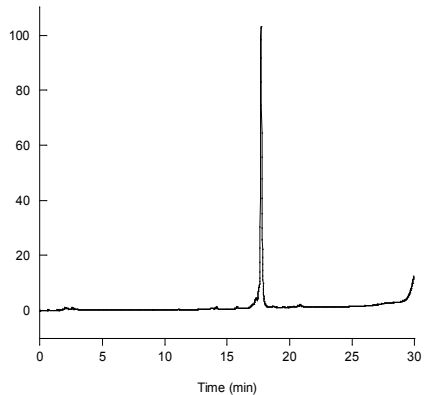

**PNA 7**

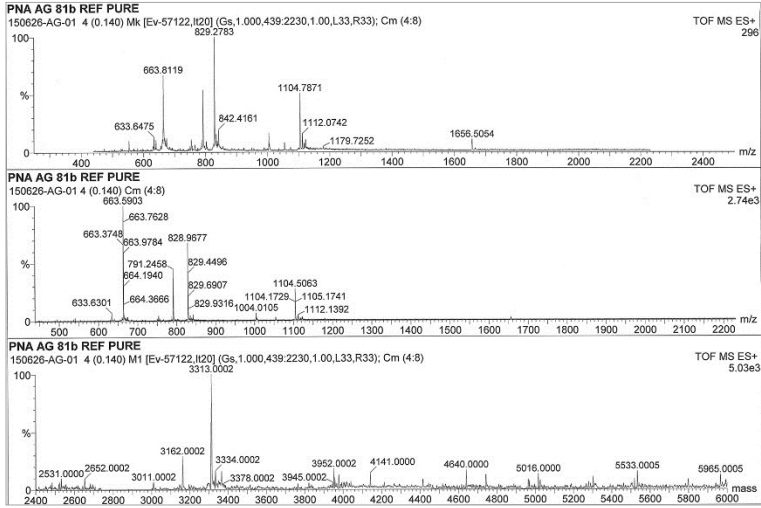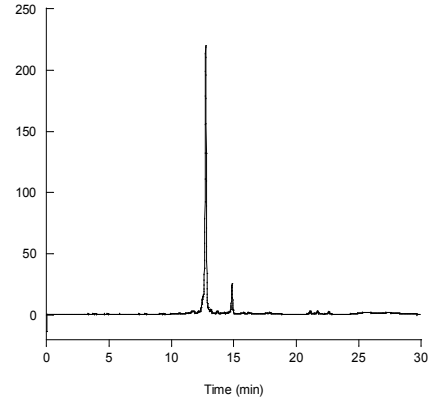

**AntimiR 1**

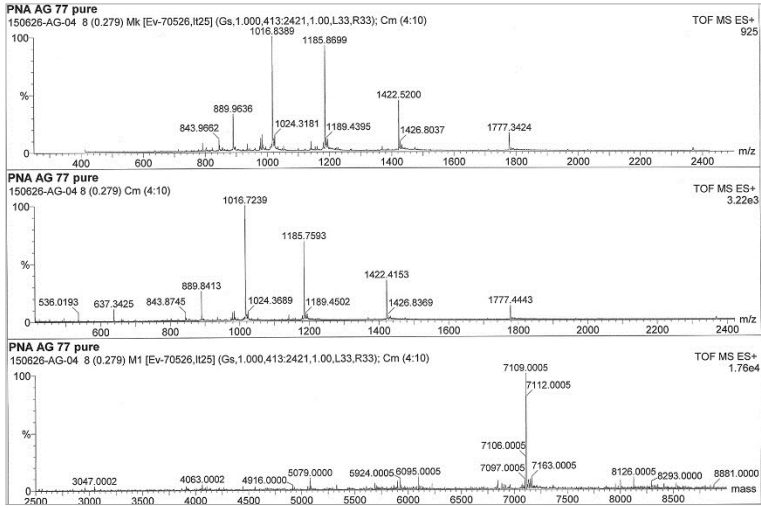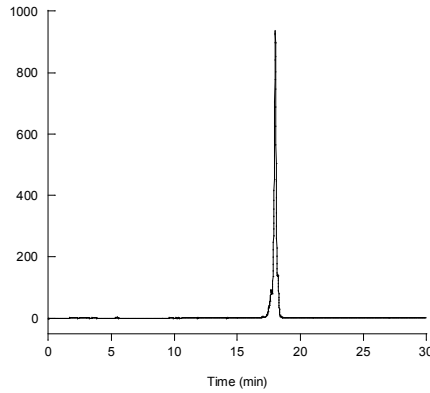

## AntimiR 2

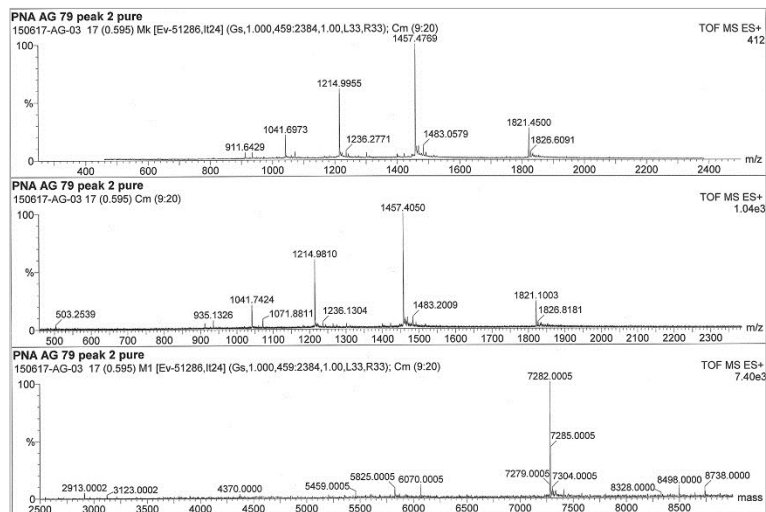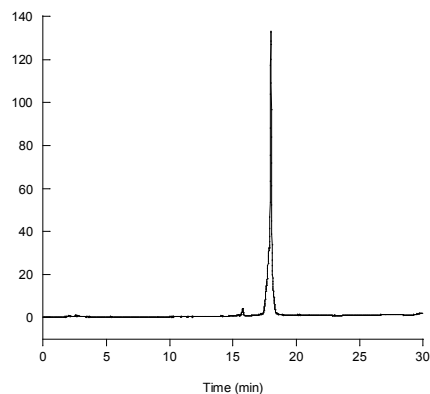

## Ref PNA

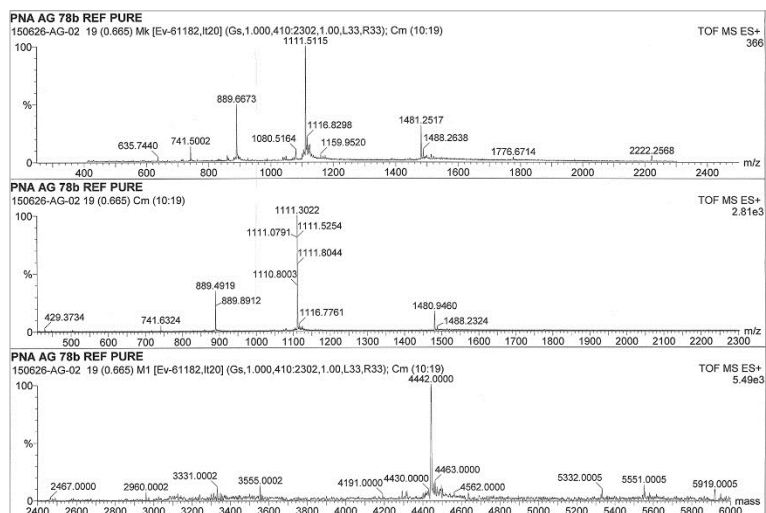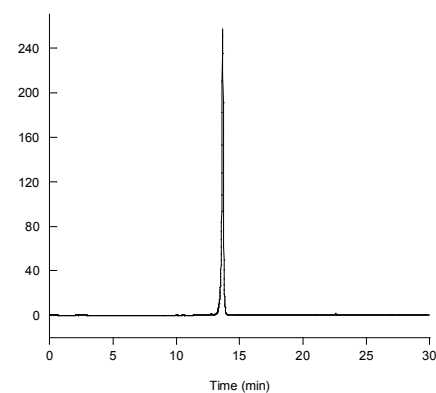

### S3. Thermal Denaturation Analysis.

UV melting experiments, absorbance vs. temperature profiles, were measured on a Varian Cary 300 UV/VIS dual beam spectrophotometer (Varian) at 260 nm. Melting temperatures were measured with 1:1 molar mixtures of PNA and the corresponding target RNA (and in different ratio in the case of PNA 4), each at a concentration of 4  $\mu$ M, in a 10 mM phosphate buffer containing 100 mM NaCl and 0.1 mM EDTA at pH 7.0. The samples were heated to rapidly to 90 °C, left for 5 min and then allowed to cool to 20 °C. After equilibration for 10 min at the starting temperature, the dissociation was recorded by heating to 90°C at rate of 0.2°C min<sup>-1</sup>. Varian Cary WinUV software version 3 was used to determine the melting temperatures ( $T_m$ ).

#### BisPNA 1 (Left panel - in presence of RNA and right panel - in presence of DNA)

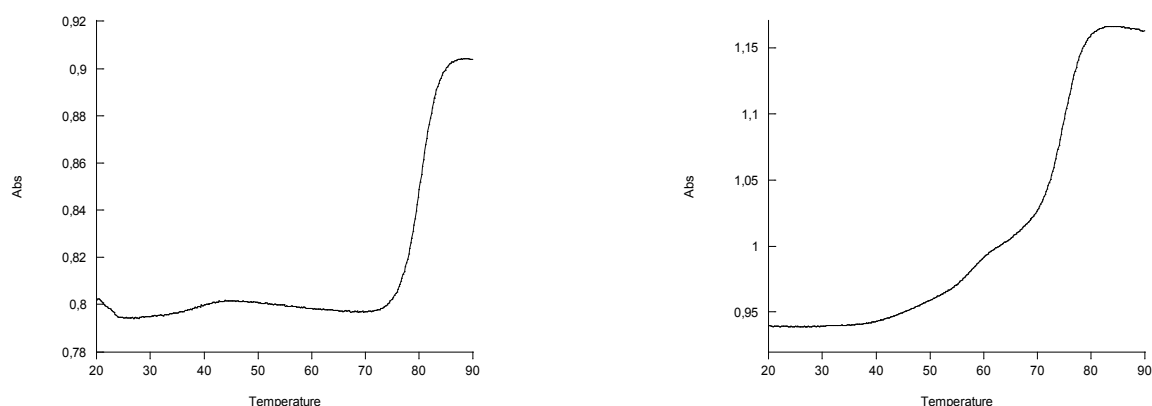

#### PNA 2 (Left panel - in presence of RNA and right panel - in presence of DNA)

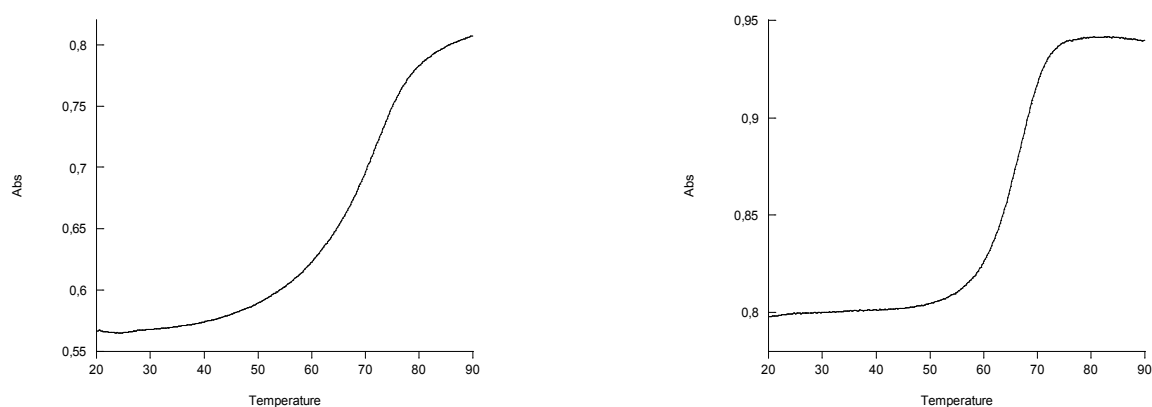



**BisPNA 3 (Left panel - in presence of RNA and right panel - in presence of DNA)**

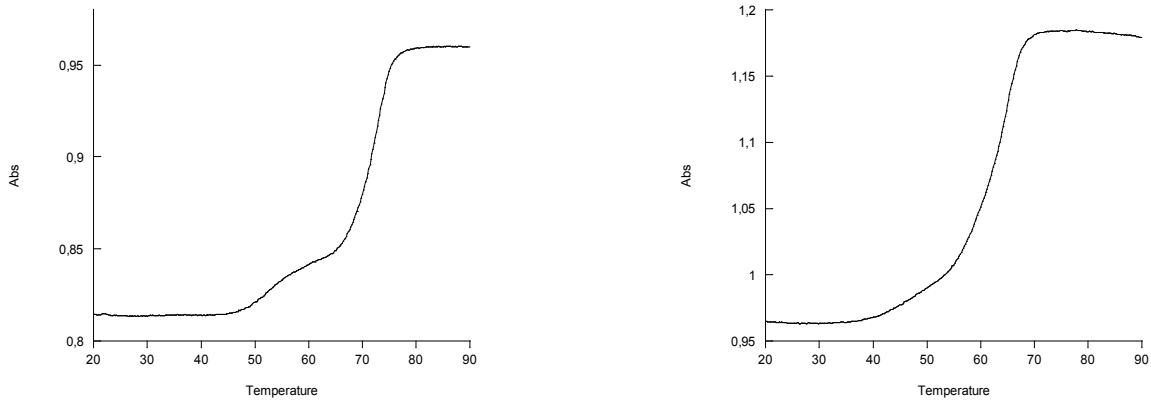

**PNA 4 (Left panel – ratio PNA:RNA=1:1 and right panel - ratio PNA:RNA=3:1)**

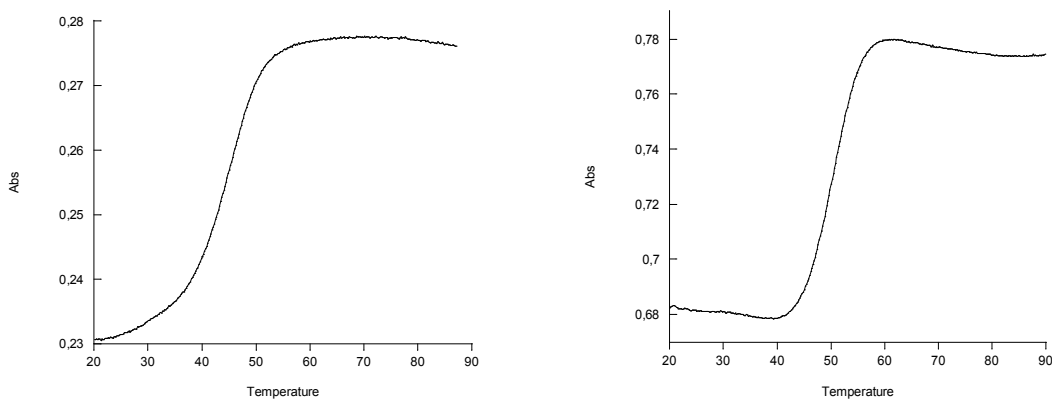

**BisPNA 5 (left panel) and BisPNA 6 (right panel) in presence of RNA**

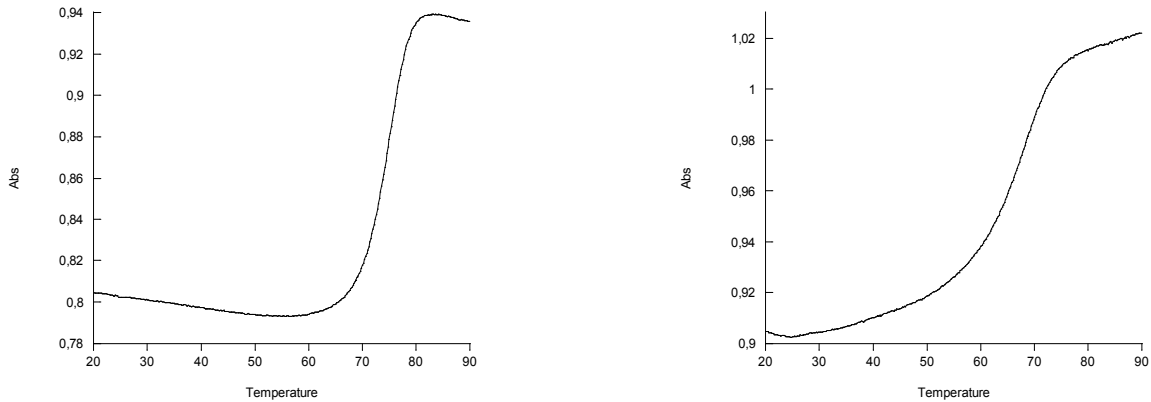

### PNA 7 (in presence of RNA)

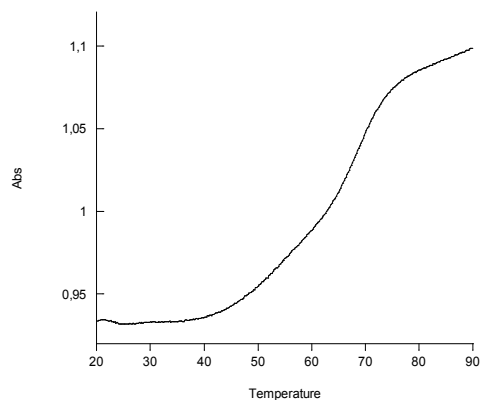

### Melting run at pH 5.5

Buffer MES: 10 mM MES, 100 mM NaCl, 100 mM EDTA

### BisPNA 5 (in presence of RNA)

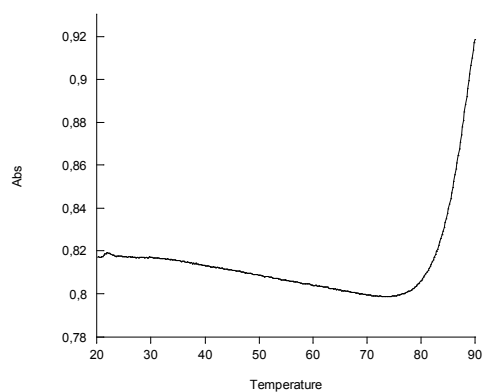

### PNA 7 (in presence of RNA):

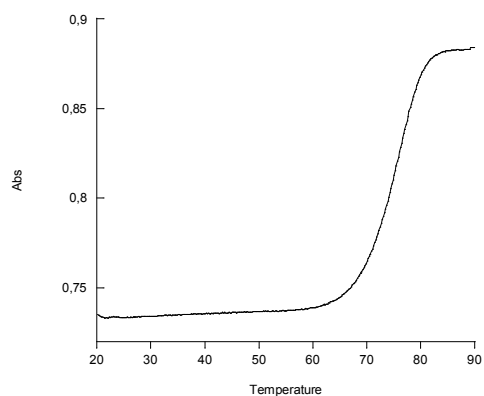

**S4.** Differences in melting point ( $\Delta T_m$ ) upon change of the ratio of **PNA 2** to **RNA target 1**. The experiments were performed as described for other  $T_m$  measurements with 4  $\mu\text{M}$  RNA, but with 2, 4, 8, 12, 16 and 32  $\mu\text{M}$  PNA.

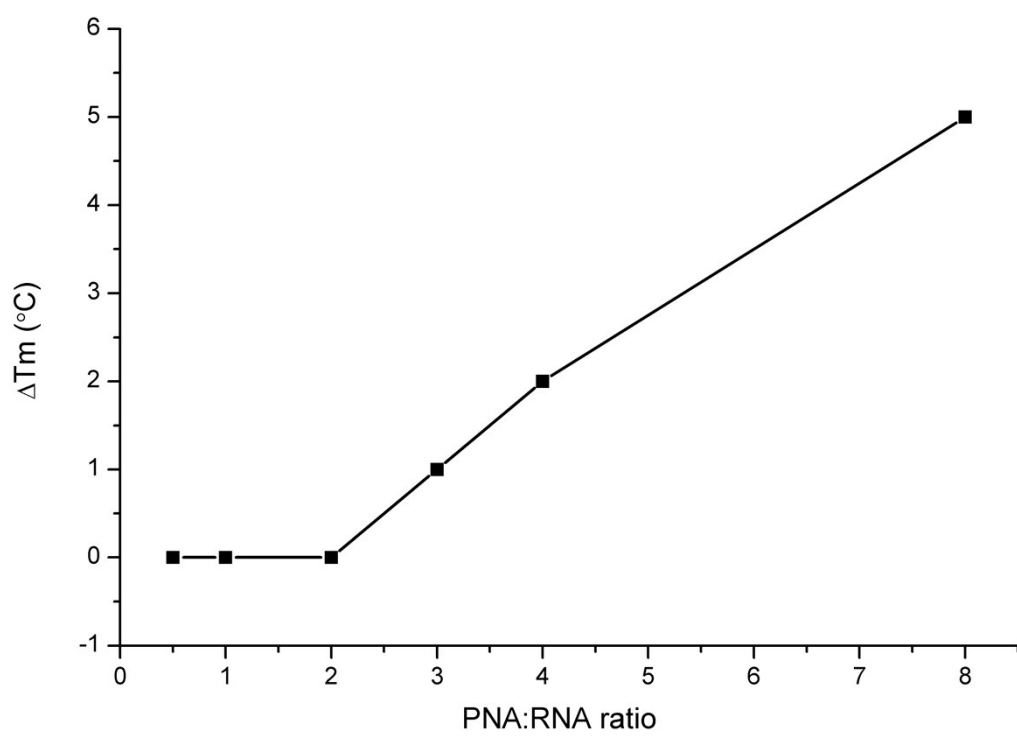

## S5. Circular Dichroism analysis.

The CD spectra were measured on an AVIV Circular Dichroism Spectrometer Model 410 with 1.0 cm path length cuvettes. The spectra were recorded as an average of five scans at 25°C and normalized by subtracting the background buffer scans. The CD spectra were obtained with 1:1 molar mixtures of PNA and the corresponding target RNA (and in different ratio in the case of PNA 4), each at a concentration of 4  $\mu$ M, in a 10 mM phosphate buffer containing 100 mM NaCl and 0.1 mM EDTA at pH 7.0. The samples were scanned between 230 nm and 380 nm.

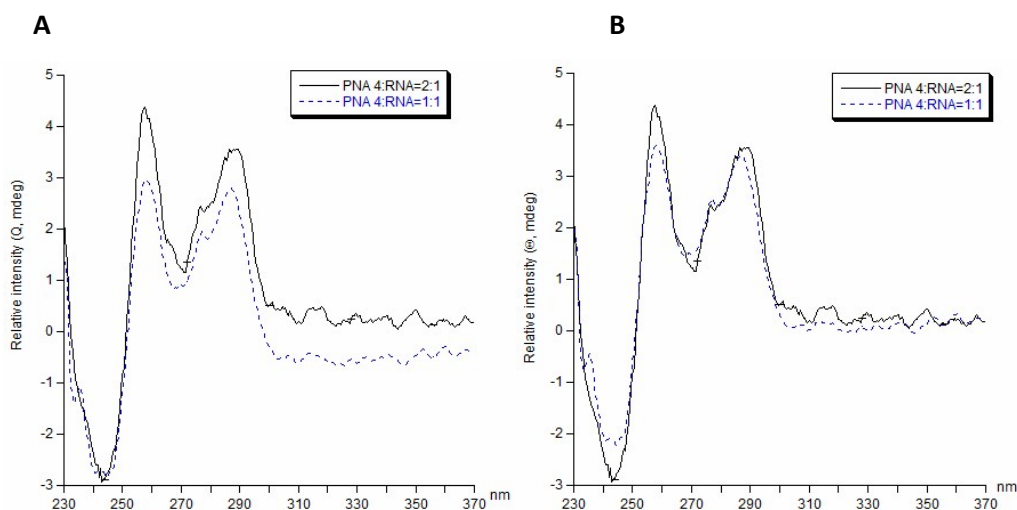

Figure S4a. CD spectra of PNA 4:RNA target 1 1:1 and 2:1 mixtures. A) as recorded. B) normalized (parallel shifted) by the average of differences at 366-370 nm.

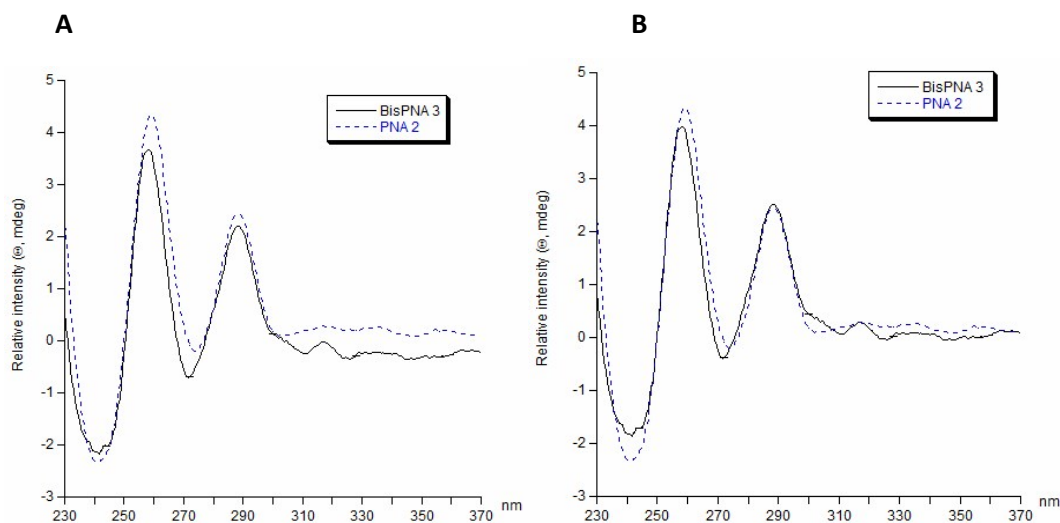

Figure S4b. CD spectra of RNA target 1 complexes with BisPNA 3 and PNA 2. A) as recorded. B) normalized (parallel shifted) by the average of differences at 366-370 nm.

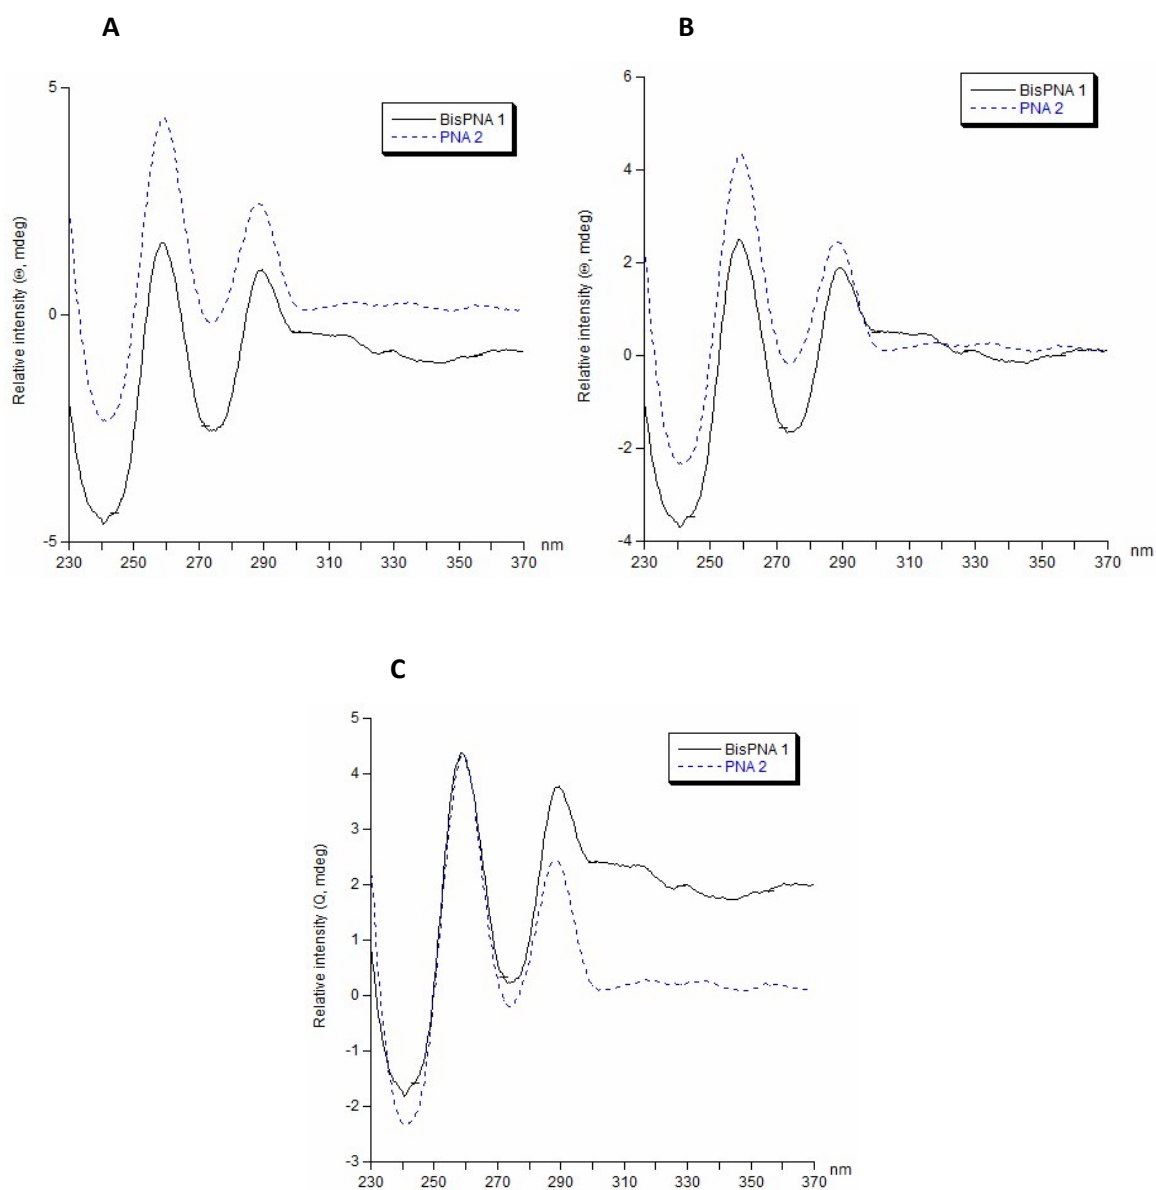

Figure S4c. CD spectra of RNA target 1 complexes with BisPNA 1 and PNA 2. A) as recorded. B) normalized (parallel shifted) by the average of differences at 366-370 nm. C) normalized (parallel shifted) by the difference at 260 nm.

## S6. Gel shift experiments.

The miR-376b RNA was 5' end-labelled using [ $\gamma$ - $^{32}\text{P}$ ]ATP and T4 polynucleotide kinase (Fermentas) and purified using G-25 columns (GE Healthcare) according to the manufacturer's protocol. 5nM of RNA was mixed with increasing concentration of PNA (AntimiR 1, AntimiR 2 and Ref PNA) in "pH 7.1" reaction buffer (20mM Tris-HCl, pH 7.1, 120mM KCl, 5mM NaCl, 0.5mM MgCl<sub>2</sub>, 10 $\mu$ M EDTA) or in "pH 5.5" reaction buffer (50mM Mes pH 5.5, 120mM KCl, 5mM NaCl, 0.5 mM MgCl<sub>2</sub>, 10 $\mu$ M EDTA) and incubated at 37 °C for 1, 24, 48 or 72 h. The samples were separated on 12% native polyacrylamide gel in 1X TBE buffer at room temperature for 3 h. Gels were exposed to a PhosphorImager screen (Fuji), scanned with Pharos FX<sup>TM</sup> Plus Molecular Imager (Bio-Rad) followed by  $^{32}\text{P}$  -signal analysis using the Image One software (Bio-Rad).
